# Supplementary material for: TiO2 as an interfacial-charge-transfer-bridge to construct eosin Y-mediated direct Z-scheme electron transfer over a Co9S8 quantum dot/TiO2 photocatalyst
Source: Royal Society of Chemistry journal article supplement (doi:10.1039/d0cy00893a), 2020-01-01
Supplement: d0cy00893a1.pdf [file d0cy00893a1.pdf]

## Supporting information for

### **TiO<sub>2</sub> as an interfacial-charge-transfer-bridge to construct Eosin Y-mediated direct Z-scheme electron transfer over Co<sub>9</sub>S<sub>8</sub> quantum dots/TiO<sub>2</sub> photocatalyst**

Xuqiang Hao<sup>a,c</sup>, Qingjie Guo<sup>b</sup>, Mei Li<sup>a</sup>, Zhiliang Jin<sup>a,b\*</sup>, Ying Wang<sup>c\*</sup>

*<sup>a</sup> School of Chemistry and Chemical Engineering, Ningxia Key Laboratory of Solar Chemical Conversion Technology, Key Laboratory for Chemical Engineering and Technology, State Ethnic Affairs Commission, North Minzu University, Yinchuan 750021, P.R.China*

*<sup>b</sup> State Key Laboratory of High-efficiency Utilization of Coal and Green Chemical Engineering, Ningxia University, Yinchuan, 750021, PR China*

*<sup>c</sup> School of Chemistry and Chemical Engineering, Eco-materials and Renewable Energy Research Center (ERERC), National Laboratory of Solid State Microstructures, Kunshan Innovation Institute of Nanjing University, Nanjing University, Nanjing, 210023, P. R. China.*

**Table S1** The average crystallite size of anatase and rutile are calculated by Scherrer's equation

| Samples                                              | Anatase (nm) | Rutile (nm) |
|------------------------------------------------------|--------------|-------------|
| TiO <sub>2</sub>                                     | 18.6         | 20.3        |
| 5% Co <sub>9</sub> S <sub>8</sub> /TiO <sub>2</sub>  | 18.6         | 20.2        |
| 10% Co <sub>9</sub> S <sub>8</sub> /TiO <sub>2</sub> | 18.4         | 20.3        |
| 20% Co <sub>9</sub> S <sub>8</sub> /TiO <sub>2</sub> | 18.7         | 20.3        |
| 25% Co <sub>9</sub> S <sub>8</sub> /TiO <sub>2</sub> | 18.5         | 20.3        |

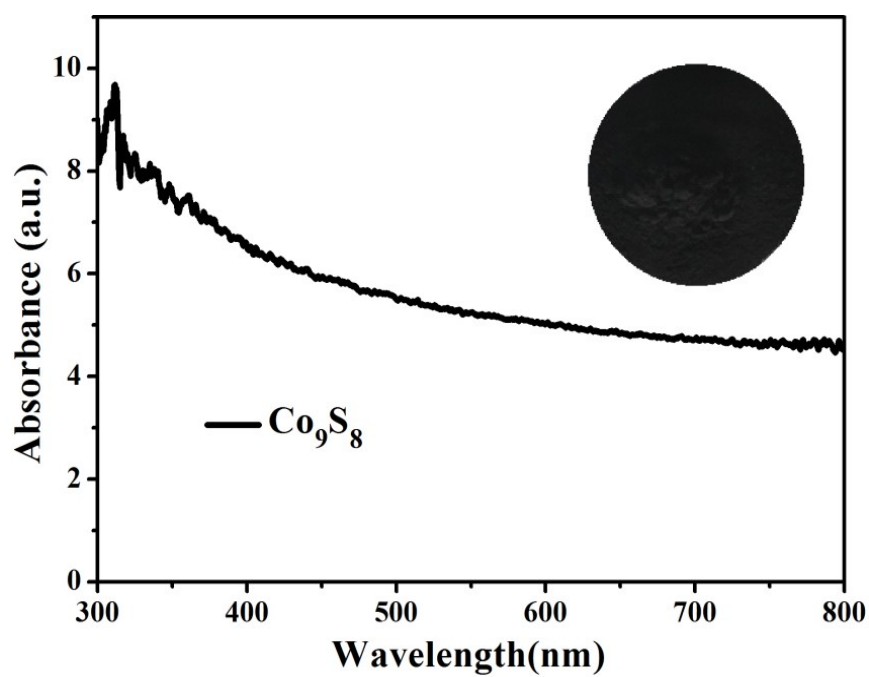

**Fig. S1.** UV-vis diffuse reflectance spectra of Co<sub>9</sub>S<sub>8</sub> (the inset image is the Co<sub>9</sub>S<sub>8</sub> sample).

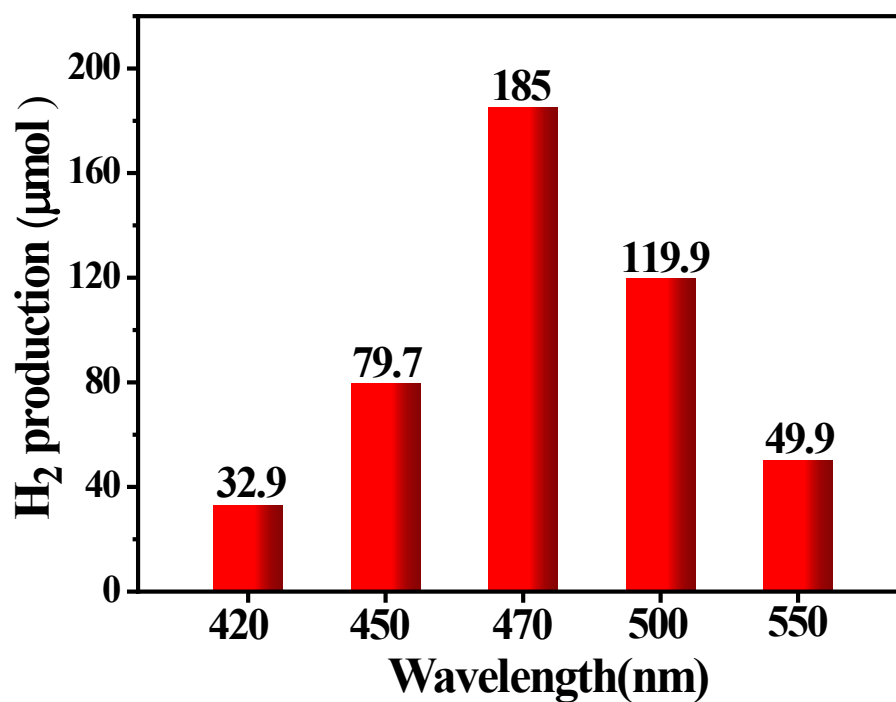

**Fig. S2.** Photocatalytic H<sub>2</sub> evolution activity for EY ( $4.0 \times 10^{-4}$  M) sensitized 20%Co<sub>9</sub>S<sub>8</sub> QDs/TiO<sub>2</sub> under different wavelength irradiation. Reaction condition: 30 mg catalyst dispersed in 100 mL 10 v/v% TEOA sacrificial reagent aqueous solution.

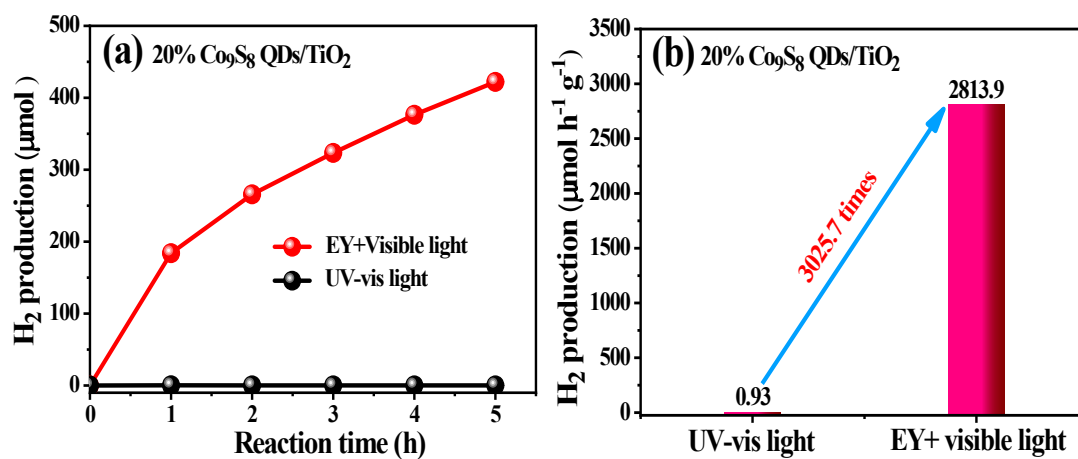

**Fig. S3.** (a) Time dependent photocatalytic H<sub>2</sub> production and (b) average hydrogen production rates of 20%Co<sub>9</sub>S<sub>8</sub>/TiO<sub>2</sub> under UV-vis light irradiation and EY-sensitized 20%Co<sub>9</sub>S<sub>8</sub> QDs/TiO<sub>2</sub> under visible light irradiation ( $\lambda \geq 420$  nm).
